# Supplementary material
Source: PubMed Central journal article supplement (PMC5916248)
Supplement: jciinsight-3-97919-s001.pdf [file jciinsight-3-97919-s001.pdf]

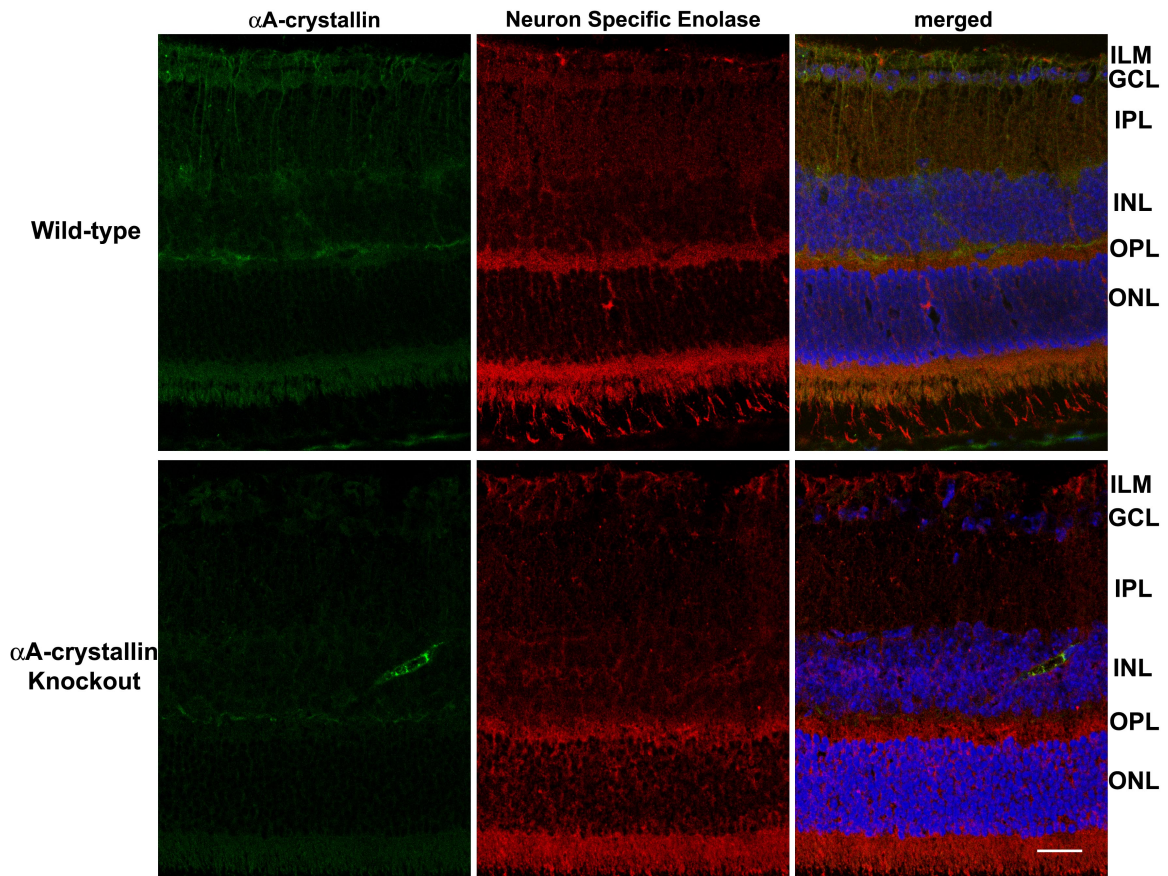

**Supplemental Figure 2: Cell-specificity of the reexpression of  $\alpha A$ -crystallin in the retina using  $\alpha A$ -crystallin KO mice.** Representative images of immunohistochemical staining for  $\alpha A$ -crystallin (green) and neuron specific enolase (NSE) on retinal cross-sections from  $\alpha A$ -crystallin knockout mice compared to wild-type mice. Nuclei were counterstained with Hoechst (blue). (scale bar = 20 $\mu$ m)

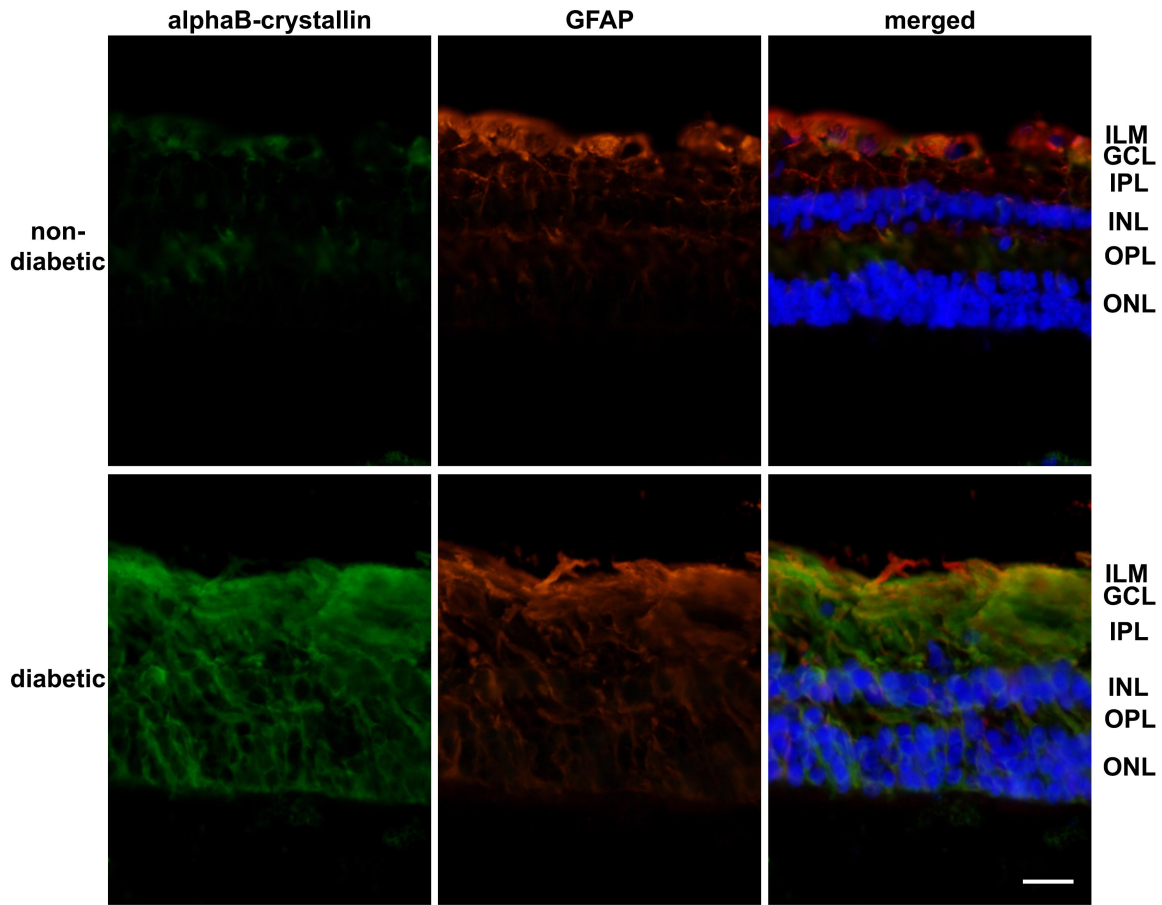

**Supplemental Figure 3: Cell specific upregulation of  $\alpha$ B-crystallin in diabetic patients with diabetic retinopathy.** Representative images of immunohistochemical staining for  $\alpha$ B-crystallin (green) and glial-fibrillary acidic protein (GFAP) on retinal cross-sections from a non-diabetic human donor and a donor with diabetic retinopathy (bottom). Nuclei were counterstained with Hoechst (blue). (scale bar = 20 $\mu$ m)



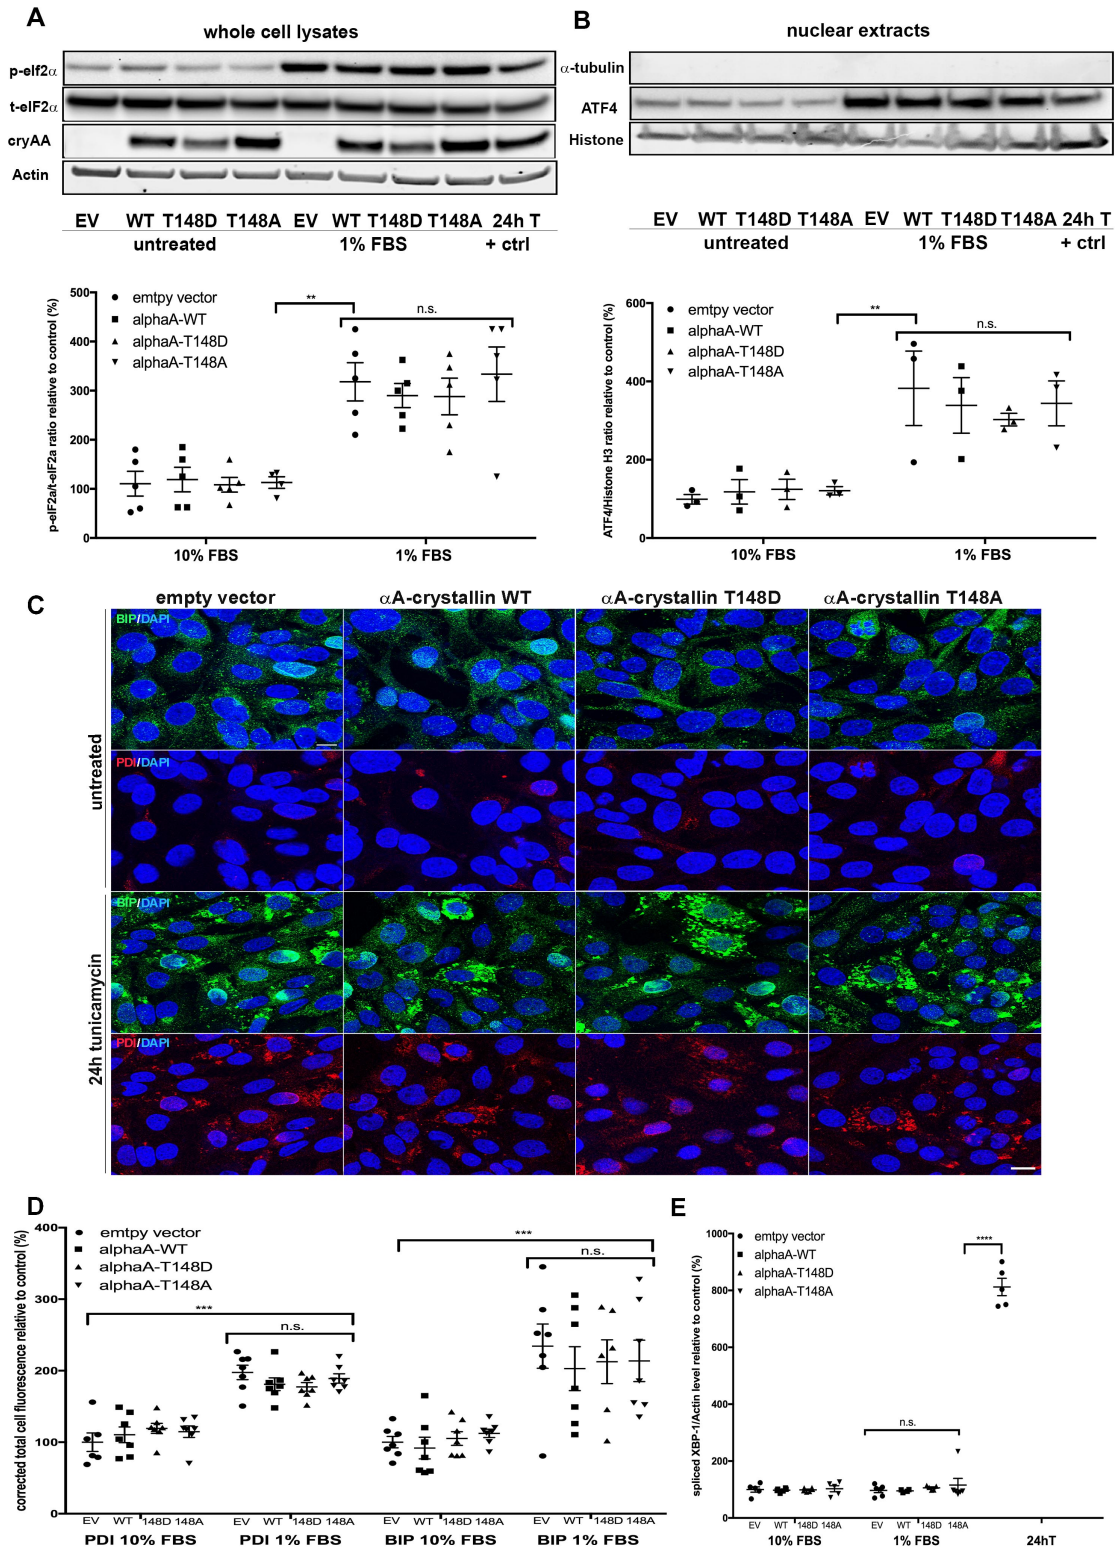

**Supplemental Figure 4:  $\alpha$ A-crystallins does not influence the endoplasmic reticulum (ER) stress response in Müller glial cells subjected to metabolic stress conditions.** (a-e) Müller glial cells were transfected with vectors overexpressing either wild-type ( $\alpha$ A-WT), the phosphomimetic ( $\alpha$ A-T148D) or the non-phosphorylatable mutant ( $\alpha$ A-T148A) of  $\alpha$ A-crystallin on threonine 148 or the empty vector (EV) control. The cells were then subjected to serum starvation (1% FBS) or tunicamycin (0.5 $\mu$ g/ml, positive

control) and the ER stress response was assessed by analysis of eif2 $\alpha$  phosphorylation (**a**), ATF4 nuclear translocation (**b**), BIP and PDI induction (**c-d**) and XBP-1 splicing (**e**). Representative images of the immunoblots and the corresponding graphic representation of the quantifications are shown for p-eIF2 $\alpha$ , t-eIF2 $\alpha$ , Actin,  $\alpha$ A-crystallin (cryAA) (**a**) and ATF4, Histone H3 and  $\alpha$ -tubulin (**b**). Representative images of the immunofluorescent staining obtained for BIP (green), PDI (51) and DAPI (blue) (**c**) and the corresponding graphic representation of the relative quantification (**d**) are provided (scale bar=7.5 $\mu$ m). Graphic representation of the quantitative real time PCR for spliced XBP-1 (**e**). Gene expression was normalized to the Actin encoding gene *Actb*. Significantly different from untreated EV transfected cells (\*\*p $\leq$ 0.01, \*\*\*p $\leq$ 0.001, \*\*\*\*p $\leq$ 0.0001). Significantly different from serum deprived EV transfected cells (#####p $\leq$ 0.0001). Each endpoint was measured on a minimum of 3 technical replicates in at least 3 independent experiments.

Supplementary Table 1. MRM Transitions for LC-MS/MS Measurement of Peptide Abundances

| Peptide                  | Sequence      | Precursor <i>m/z</i> | Transitions (fragment ion, <i>m/z</i> )                                           |
|--------------------------|---------------|----------------------|-----------------------------------------------------------------------------------|
| $\alpha$ A 145-156       | VQSGLDAGHSER  | 628.30 <sup>++</sup> | y5, 585.27<br>y6, 656.31<br>y7, 771.34<br>y9, 941.44<br>y10, 1028.48              |
| $\alpha$ A 145-156 phos. | VQpSGLDAGHSER | 668.29 <sup>++</sup> | y5, 585.27<br>y6, 656.31<br>y7, 771.34<br>y9, 941.44<br>y10, 1010.47 <sup>a</sup> |

<sup>a</sup> y10 ion monitored as [m-98]<sup>+</sup> ion

Supplementary Table 2. Overview over the quantitative real time PCR probes  
rat genes info

| Gene Symbol | Gene name               | Rat ref seq accession | Applied Biosystems Assay # |
|-------------|-------------------------|-----------------------|----------------------------|
| XBP-1 (S)   | X-box binding protein 1 | NM_000394.3           | Rn03464499_m1              |
| XBP-1 (U)   | X-box binding protein 1 | NM_001004210.2        | Rn03464498_s1              |

$\beta$ -Actin was used as the housekeeping gene (Applied Biosystems #4352341E)

human genes info

| Gene Symbol | Gene name          | Rat ref seq accession | Applied Biosystems Assay # |
|-------------|--------------------|-----------------------|----------------------------|
| CRYAA       | crystallin alpha A | NM_001271731.1        | Hs00166138_m1              |
| CRYAB       | crystallin alpha B | NM_001289807.1        | Hs00157107_m1              |

$\beta$ -Actin was used as the housekeeping gene (Applied Biosystems #4325788)
